# Supplementary material
Source: PubMed Central journal article supplement (PMC5724016)
Supplement: 10.1074_M117.802736_jbc.M117.802736-2.pdf [file 10.1074_M117.802736_jbc.M117.802736-2.pdf]

**A retractable lid in lecithin:cholesterol acyltransferase provides a structural mechanism for activation by apolipoprotein A-I**

Kelly A. Manthei<sup>1</sup>, Joomi Ahn<sup>2</sup>, Alisa Glukhova<sup>1,3</sup>, Wenmin Yuan<sup>4</sup>, Christopher Larkin<sup>2</sup>, Taylor D. Manett<sup>1</sup>, Louise Chang<sup>1</sup>, James A. Shayman<sup>5</sup>, Milton J. Axley<sup>2</sup>, Anna Schwendeman<sup>4</sup>, John J.G. Tesmer<sup>1†</sup>

<sup>1</sup> From the Life Sciences Institute and the Departments of Pharmacology and Biological Chemistry, University of Michigan, Ann Arbor, Michigan 48109

<sup>2</sup> MedImmune, Gaithersburg, MD 20878

<sup>3</sup> Current address: Drug Discovery Biology, Monash Institute of Pharmaceutical Sciences Biology, and Department of Pharmacology, Monash University, Parkville, Victoria 3052, Australia

<sup>4</sup> Department of Pharmaceutical Science, Biointerfaces Institute, University of Michigan, Ann Arbor, MI

<sup>5</sup> Department of Internal Medicine, University of Michigan, Ann Arbor, Michigan 48109

Running title: *The closed lid conformation of LCAT*

---

**Table of Contents**

**Supplemental Tables**

**Table S1.** pNPB hydrolysis and  $\Delta T_m$  of LCAT variants.

**Table S2.** LCAT binding to ApoA-I and peptide HDLs measured by BLI.

**Table S3.** LCAT acyltransferase activity with ApoA-I HDLs.

**Supplemental Figures and Legends**

**Figure S1.** Comparison of different open and closed LCAT and LPLA2 structures.

**Figure S2.** Low-resolution LCAT structure must adopt an open conformation due to crystal packing interactions.

**Figure S3.** Gel of purified LCAT variants.

**Figure S4.** Comparison of BLI loading data.

**Figure S5.** Plots used to determine  $k_{on}$  (slope of fit line) and hence  $K_d$  (see methods).

**Figure S6.** 95% of LCAT sequence coverage achieved by online pepsin digestion.

**Figure S7.** HDX MS difference plots.

**Figure S8.** Deuterium uptake curves for a total of 187 peptides in the sequence coverage map.

**Figure S9.** LCAT derivatization with IDFP.

**Figure S10.** HDX MS data processing workflow.

**Supplemental Movie Legend**

**Movie S1.** Hypothetical transition between closed and open conformations of LCAT.

**Table S1.** pNPB hydrolysis and  $\Delta T_m$  of LCAT variants.

| <b>Variant</b>                  | <b>Location</b>                       | <b><math>\Delta T_m \pm SD</math> (°C)</b> | <b>n</b> | <b>Esterase rate <math>\pm SD</math> (<math>A_{400}/\text{min}</math>)</b> | <b>n</b> |
|---------------------------------|---------------------------------------|--------------------------------------------|----------|----------------------------------------------------------------------------|----------|
| WT                              |                                       |                                            | 18       | $0.014 \pm 0.003$                                                          | 39       |
| $\Delta N\Delta C$              |                                       | $1.2 \pm 1$                                | 4        | $0.025 \pm 0.004$                                                          | 5        |
| S181A                           | Active site                           | $-0.67 \pm 0.3$                            | 3        | $0.0059 \pm 0.001$                                                         | 3        |
| W48A                            | MBD                                   | $3.1 \pm 1$                                | 3        | $0.024 \pm 0.001$                                                          | 3        |
| L70S                            | MBD                                   | $0.53 \pm 0.3$                             | 3        | $0.028 \pm 0.002$                                                          | 3        |
| T123A                           | ApoA-I?                               | $-0.40 \pm 0.4$                            | 3        | $0.014 \pm 0.003$                                                          | 4        |
| T123I <sup>a</sup>              | ApoA-I?                               | $1.2 \pm 0.2$                              | 3        | $0.016 \pm 0.001$                                                          | 4        |
| N131A                           | ApoA-I?                               | $-0.73 \pm 0.3$                            | 3        | $0.014 \pm 0.002$                                                          | 3        |
| N131D <sup>a</sup>              | ApoA-I?                               | $-2.1 \pm 1$                               | 4        | $0.0074 \pm 0.001$                                                         | 3        |
| F382A                           | ApoA-I?                               | $0.17 \pm 0.5$                             | 6        | $0.034 \pm 0.006$                                                          | 8        |
| F382V <sup>a</sup>              | ApoA-I?                               | $0.24 \pm 0.6$                             | 5        | $0.012 \pm 0.002$                                                          | 5        |
| F382E                           | ApoA-I?                               | $-0.80 \pm 0.26$                           | 3        | $0.026 \pm 0.002$                                                          | 3        |
| N391A                           | ApoA-I?                               | $-2.0 \pm 0.7$                             | 4        | $0.011 \pm 0.002$                                                          | 3        |
| N391S <sup>a</sup>              | ApoA-I?                               | $-1.4 \pm 0.4$                             | 3        | $0.0094 \pm 0.001$                                                         | 3        |
| G230R <sup>a</sup>              | Lid                                   | $-1.0 \pm 0.3$                             | 3        | $0.023 \pm 0.002$                                                          | 4        |
| P232A                           | Lid                                   | $-0.87 \pm 0.5$                            | 3        | $0.017 \pm 0.002$                                                          | 4        |
| I233A                           | Lid                                   | $-0.63 \pm 0.3$                            | 3        | $0.026 \pm 0.0009$                                                         | 3        |
| I233E                           | Lid                                   | $-2.3 \pm 0.3$                             | 3        | $0.025 \pm 0.002$                                                          | 3        |
| M234A                           | Lid                                   | $-0.57 \pm 0.5$                            | 3        | $0.019 \pm 0.002$                                                          | 3        |
| S235A                           | Lid                                   | $-0.73 \pm 0.3$                            | 3        | $0.016 \pm 0.001$                                                          | 4        |
| S236A                           | Lid                                   | $0.20 \pm 0.6$                             | 3        | $0.018 \pm 0.001$                                                          | 3        |
| $\Delta\text{lid}$              | Lid                                   | $1.3 \pm 1$                                | 11       | $0.028 \pm 0.008$                                                          | 8        |
| $\Delta\text{lid}/\text{F382A}$ | Lid/ApoA-I?                           | $1.8 \pm 0.6$                              | 3        | $0.032 \pm 0.003$                                                          | 4        |
| LPLA2lid                        | Lid                                   | $-2.0 \pm 0.5$                             | 3        | $0.013 \pm 0.002$                                                          | 3        |
| LPLA2 $\alpha\text{A}$          | $\alpha\text{A}-\alpha\text{A}'$ loop | $-1.3 \pm 0.4$                             | 3        | $0.011 \pm 0.001$                                                          | 3        |

<sup>a</sup>indicates disease-related mutants

MBD indicates membrane-binding domain; ApoA-I? indicates disease-related surface-exposed residues that could potentially bind ApoA-I

**Table S2.** LCAT binding to ApoA-I and peptide HDLs measured by BLI.

| Variant               | ApoA-I HDLs            |                  |    | 22A HDLs               |                  |    |
|-----------------------|------------------------|------------------|----|------------------------|------------------|----|
|                       | Response $\pm$ SD (nm) | % of WT $\pm$ SD | n  | Response $\pm$ SD (nm) | % of WT $\pm$ SD | n  |
| WT                    | 0.18 $\pm$ 0.02        |                  | 16 | 0.28 $\pm$ 0.03        |                  | 14 |
| $\Delta$ N $\Delta$ C | 0.023 $\pm$ 0.01       | 14 $\pm$ 8       | 2  | 0.025 $\pm$ 0.002      | 11 $\pm$ 0.3     | 2  |
| S181A                 | 0.10 $\pm$ 0.006       | 61 $\pm$ 0.4     | 2  | 0.17 $\pm$ 0.02        | 68 $\pm$ 10      | 2  |
| W48A                  | 0.029 $\pm$ 0.008      | 17 $\pm$ 5       | 2  | 0.041 $\pm$ 0.007      | 15 $\pm$ 5       | 3  |
| L70S                  | 0.027 $\pm$ 0.004      | 16 $\pm$ 3       | 2  | 0.021 $\pm$ 0.005      | 7.7 $\pm$ 3      | 3  |
| T123A                 | 0.17 $\pm$ 0.007       | 89 $\pm$ 5       | 2  | 0.25 $\pm$ 0.02        | 90 $\pm$ 6       | 2  |
| T123I                 | 0.14 $\pm$ 0.02        | 73 $\pm$ 7       | 2  | 0.20 $\pm$ 0.008       | 72 $\pm$ 6       | 2  |
| N131A                 | 0.15 $\pm$ 0.0         | 80 $\pm$ 5       | 2  | 0.20 $\pm$ 0.02        | 74 $\pm$ 20      | 2  |
| N131D                 | 0.082 $\pm$ 0.01       | 45 $\pm$ 9       | 2  | 0.13 $\pm$ 0.01        | 43 $\pm$ 4       | 2  |
| F382A                 | 0.27 $\pm$ 0.1         | 120 $\pm$ 30     | 6  | 0.29 $\pm$ 0.03        | 100 $\pm$ 20     | 4  |
| F382V                 | 0.19 $\pm$ 0.01        | 96 $\pm$ 10      | 2  | 0.29 $\pm$ 0.002       | 100 $\pm$ 5      | 2  |
| F382E                 | 0.21 $\pm$ 0.02        | 110 $\pm$ 10     | 2  | 0.31 $\pm$ 0.02        | 110 $\pm$ 5      | 2  |
| N391A                 | 0.12 $\pm$ 0.007       | 63 $\pm$ 5       | 2  | 0.17 $\pm$ 0.01        | 61 $\pm$ 8       | 2  |
| N391S                 | 0.12 $\pm$ 0.01        | 63 $\pm$ 8       | 2  | 0.19 $\pm$ 0.01        | 67 $\pm$ 7       | 2  |
| G230R                 | 0.078 $\pm$ 0.006      | 42 $\pm$ 2       | 2  | 0.14 $\pm$ 0.02        | 46 $\pm$ 8       | 2  |
| P232A                 | 0.081 $\pm$ 0.005      | 44 $\pm$ 0       | 2  | 0.142 $\pm$ 0.00       | 48 $\pm$ 1       | 2  |
| I233A                 | 0.041 $\pm$ 0.004      | 21 $\pm$ 3       | 2  | 0.083 $\pm$ 0.01       | 29 $\pm$ 4       | 2  |
| I233E                 | 0.048 $\pm$ 0.001      | 26 $\pm$ 2       | 2  | 0.056 $\pm$ 0.006      | 20 $\pm$ 2       | 2  |
| M234A                 | 0.079 $\pm$ 0.001      | 43 $\pm$ 4       | 2  | 0.14 $\pm$ 0.002       | 48 $\pm$ 3       | 2  |
| S235A                 | 0.16 $\pm$ 0.02        | 95 $\pm$ 10      | 4  | 0.26 $\pm$ 0.004       | 88 $\pm$ 0.5     | 2  |
| S236A                 | 0.062 $\pm$ 0.03       | 36 $\pm$ 20      | 4  | 0.20 $\pm$ 0.03        | 67 $\pm$ 10      | 2  |
| $\Delta$ lid          | 0.073 $\pm$ 0.01       | 40 $\pm$ 9       | 7  | 0.078 $\pm$ 0.02       | 29 $\pm$ 8       | 6  |
| $\Delta$ lid/F382A    | 0.089 $\pm$ 0.003      | 48 $\pm$ 4       | 2  | 0.10 $\pm$ 0.001       | 34 $\pm$ 1       | 2  |
| LPLA2lid              | 0.061 $\pm$ 0.005      | 35 $\pm$ 3       | 4  | 0.090 $\pm$ 0.006      | 33 $\pm$ 9       | 3  |
| LPLA2 $\alpha$ A      | 0.057 $\pm$ 0.009      | 29 $\pm$ 1       | 2  | 0.042 $\pm$ 0.003      | 15 $\pm$ 2       | 3  |

**Table S3.** LCAT acyltransferase activity with ApoA-I HDLs.

| Variant    | V <sub>max</sub> ± SD (μM/hr) | K <sub>m</sub> ± SD (μM) | V <sub>max</sub> /K <sub>m</sub> | Sig. <sup>b</sup> | n  |
|------------|-------------------------------|--------------------------|----------------------------------|-------------------|----|
| WT         | 14 ± 0.3                      | 11 ± 0.6                 | 1.3                              |                   | 22 |
| ΔNΔC       | ND <sup>a</sup>               | ND                       |                                  | **                | 3  |
| S181A      | ND                            | ND                       |                                  | **                | 3  |
| W48A       | 17 ± 0.7                      | 21 ± 2                   | 0.81                             | ns                | 3  |
| L70S       | 15 ± 0.7                      | 19 ± 2                   | 0.79                             | ns                | 3  |
| T123A      | 0.79 ± 0.4                    | 1.9 ± 5                  | 0.42                             | **                | 3  |
| T123I      | 1.5 ± 0.5                     | ND                       |                                  | *                 | 3  |
| F382A      | 0.27 ± 0.2                    | ND                       |                                  | **                | 6  |
| F382V      | 2.2 ± 0.4                     | 0.96 ± 1.4               | 2.3                              | *                 | 3  |
| F382E      | 0.51 ± 0.6                    | ND                       |                                  | **                | 3  |
| N131A      | 20 ± 1                        | 12 ± 2                   | 1.7                              | ns                | 3  |
| N131D      | 2.8 ± 0.4                     | 3.6 ± 2                  | 0.78                             | *                 | 3  |
| N391A      | 5.3 ± 0.4                     | 3.5 ± 1                  | 1.5                              | ns                | 3  |
| N391S      | 5.0 ± 0.4                     | 2.6 ± 0.9                | 1.9                              | ns                | 3  |
| G230R      | 7.9 ± 0.5                     | 3.7 ± 1                  | 2.1                              | ns                | 3  |
| P232A      | 7.1 ± 0.4                     | 4.7 ± 1                  | 1.5                              | ns                | 3  |
| I233A      | 11 ± 0.6                      | 11 ± 2                   | 1.0                              | ns                | 3  |
| I233E      | ND                            | ND                       |                                  | **                | 3  |
| M234A      | 12 ± 0.7                      | 6.2 ± 1                  | 1.9                              | ns                | 3  |
| S235A      | 7.6 ± 0.5                     | 5.2 ± 1                  | 1.5                              | ns                | 3  |
| S236A      | 11 ± 1                        | 4.8 ± 2                  | 2.3                              | ns                | 3  |
| Δlid       | 0.52 ± 0.2                    | ND                       |                                  | **                | 8  |
| Δlid/F382A | 0.48 ± 0.2                    | ND                       |                                  | **                | 3  |
| LPLA2 lid  | 2.4 ± 0.3                     | 0.65 ± 0.8               | 3.7                              | *                 | 3  |
| LPLA2 αA   | 0.40 ± 0.3                    | ND                       |                                  | **                | 3  |

<sup>a</sup>ND = not determined, signal too low to determine an accurate fit

<sup>b</sup>Sig. represents significance compared to WT using a two-tailed t-test, ns indicates not significant, \*0.01<P<0.05, \*\*0.001<P<0.01

**Figure S1**

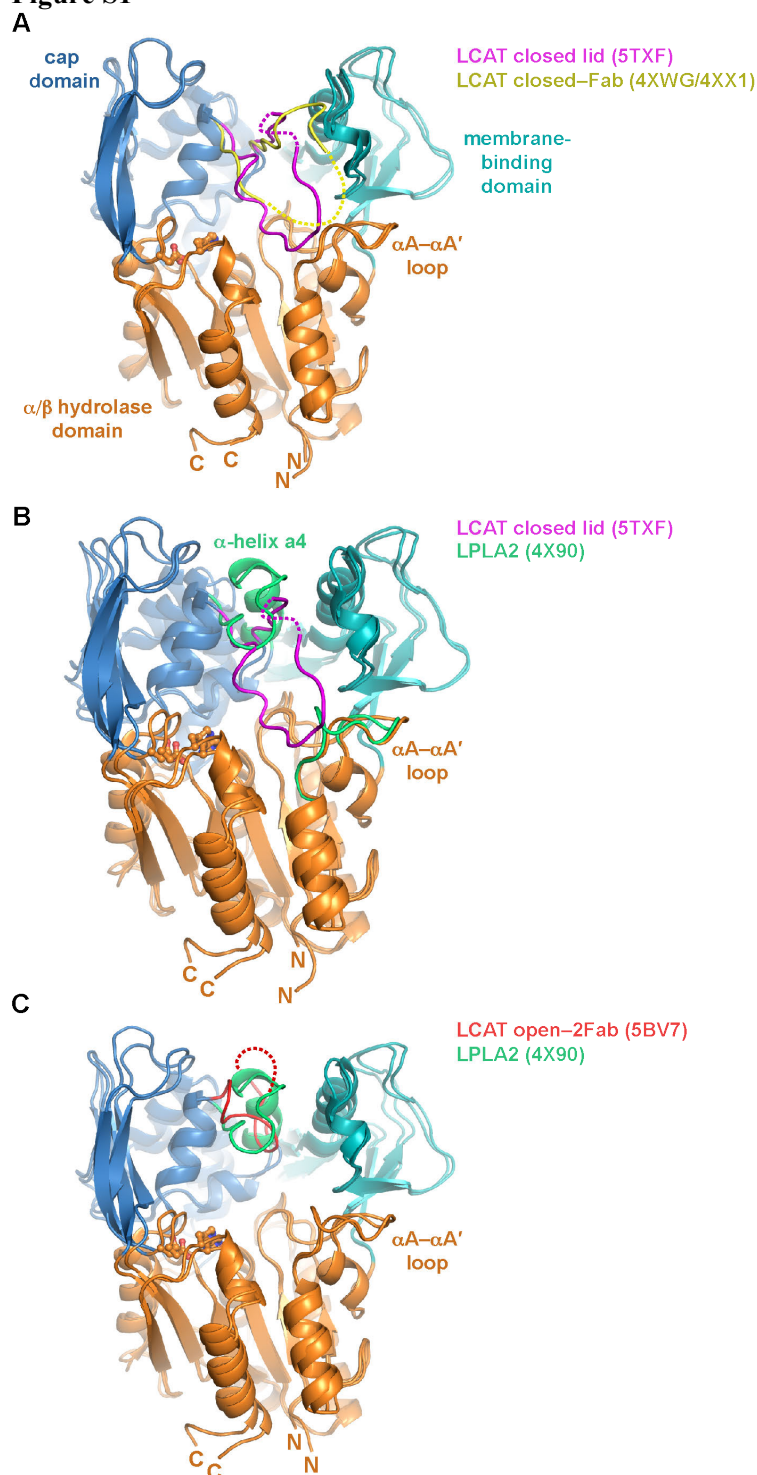

**Figure S1.** Comparison of different open and closed LCAT and LPLA2 structures. (A) Closed LCAT structure described here (PDB entry 5TXF) overlaid with closed-Fab (4XWG, contains mutation C31Y). (B) LCAT superimposed with LPLA2 (4X90) with large structural differences shown in green. Notably, the lid is retracted and the  $\alpha A$ - $\alpha A'$  loop is two residues longer in LPLA2, which would clash with the lid conformation observed in the closed structure of LCAT. (C) Open-2Fab structure (5BV7) overlaid with LPLA2. Unmodeled residues are indicated with dashed lines.

Figure S2

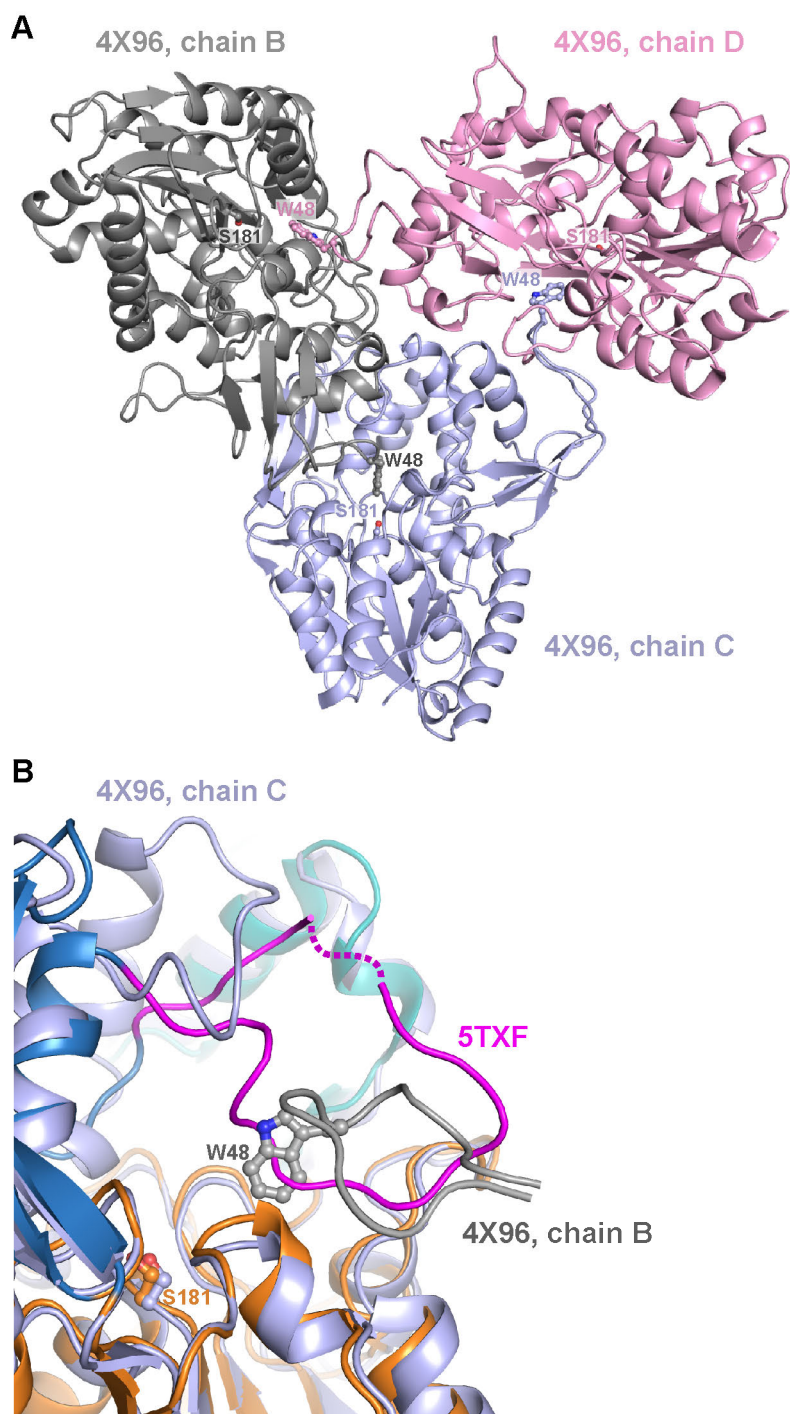

**Figure S2.** Low-resolution LCAT structure must adopt an open conformation due to crystal packing interactions. **(a)** In the low-resolution structure (4X96), LCAT crystallized as a trimer with Trp48 (shown as ball-and-sticks) docked in the active site (represented by Ser181) of another LCAT protomer. **(b)** The closed structure reported here (5TXF) is overlaid with 4X96 to show that the extended lid is incompatible with the low-resolution structure crystal packing.

Figure S3

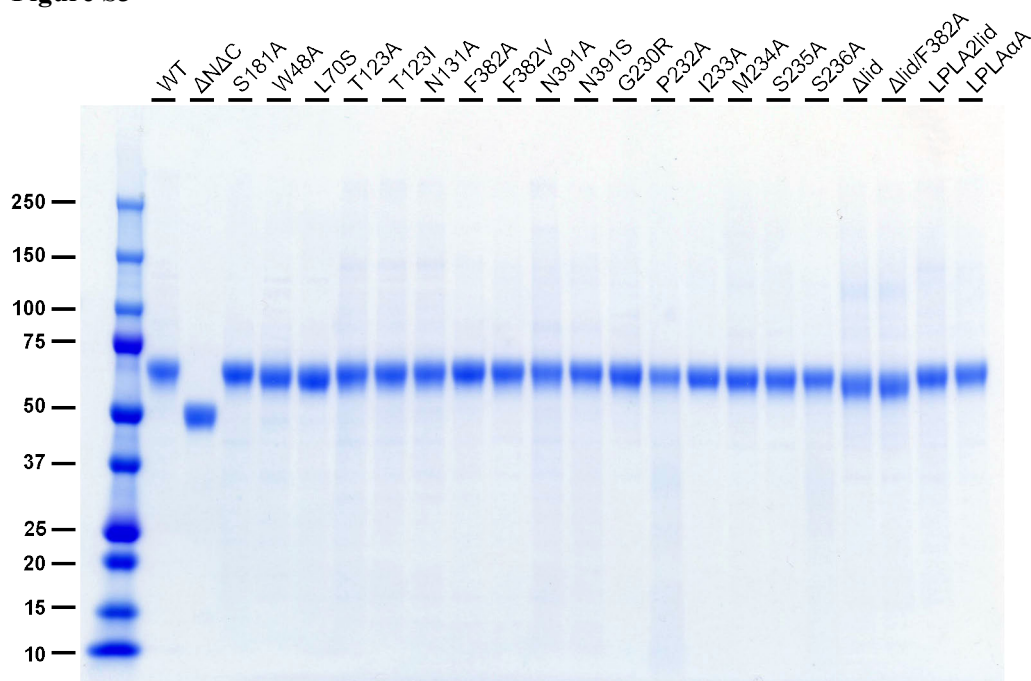

**Figure S3.** Gel of purified LCAT variants. Approximately 1.5  $\mu$ g of each purified LCAT variant used in biochemical analysis was loaded to the gel. Variants N131D, F382E, and I233E are not shown in this gel, but were of comparable purity.

Figure S4

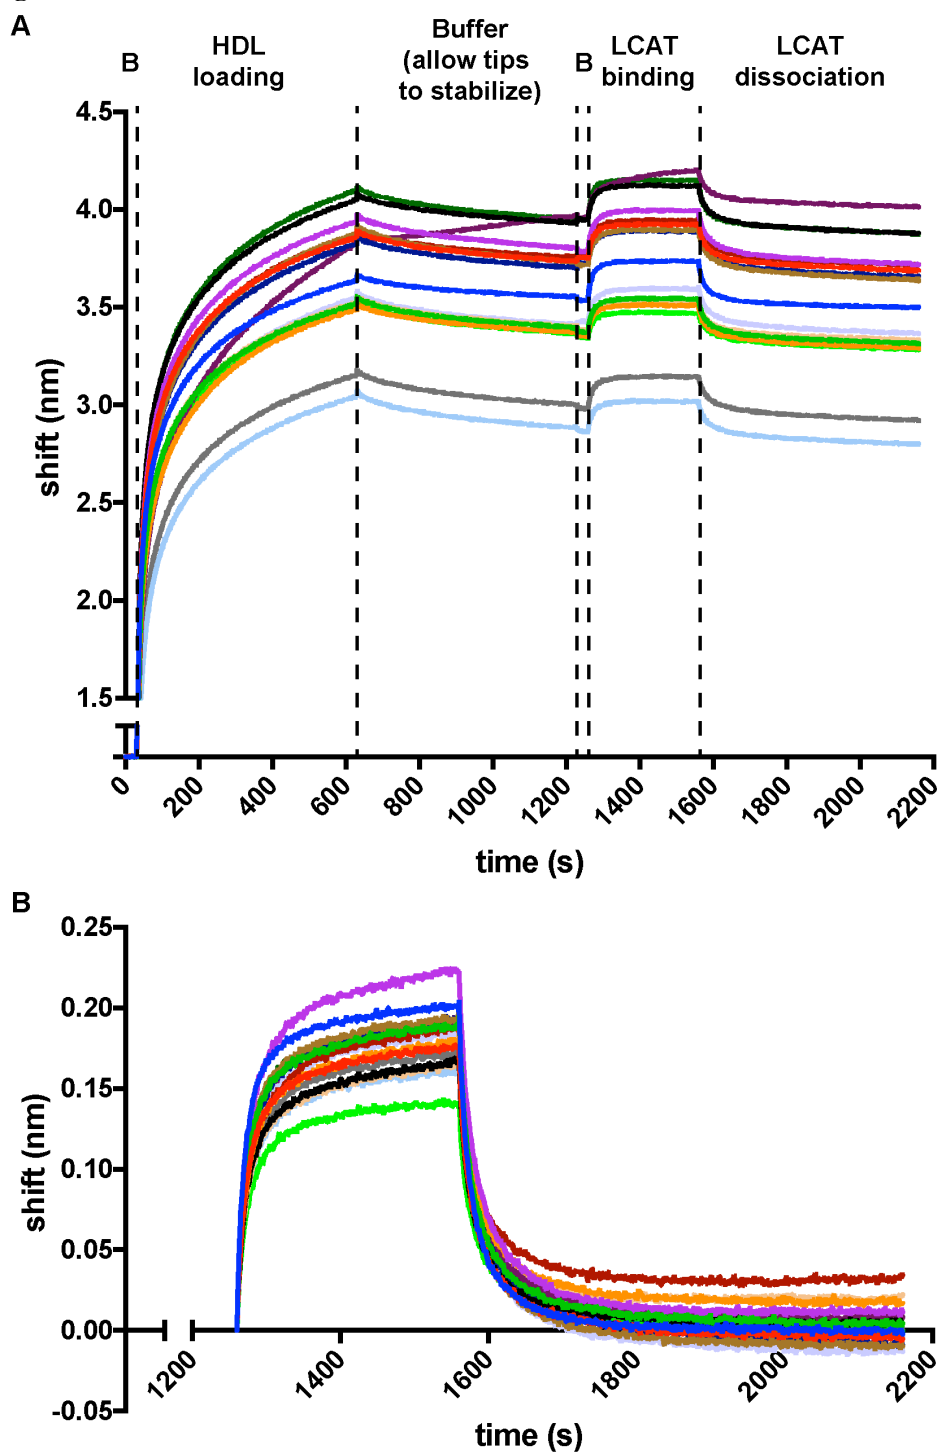

**Figure S4.** Comparison of BLI loading data. (A) 16 different replicates of WT LCAT binding to ApoA-I HDLs are shown to compare HDL loading. In all 16 the ApoA-I HDL sample was diluted 1/20 and 0.2  $\mu\text{M}$  LCAT was used in the binding step. B refers to a 30 s baseline step. (B) The LCAT binding and dissociation steps are shown after buffer and baseline subtraction to show that the different levels of HDL loading do not correlate with the final magnitude of LCAT binding. The color of the curve indicates the same experiment in each panel.



Figure S5

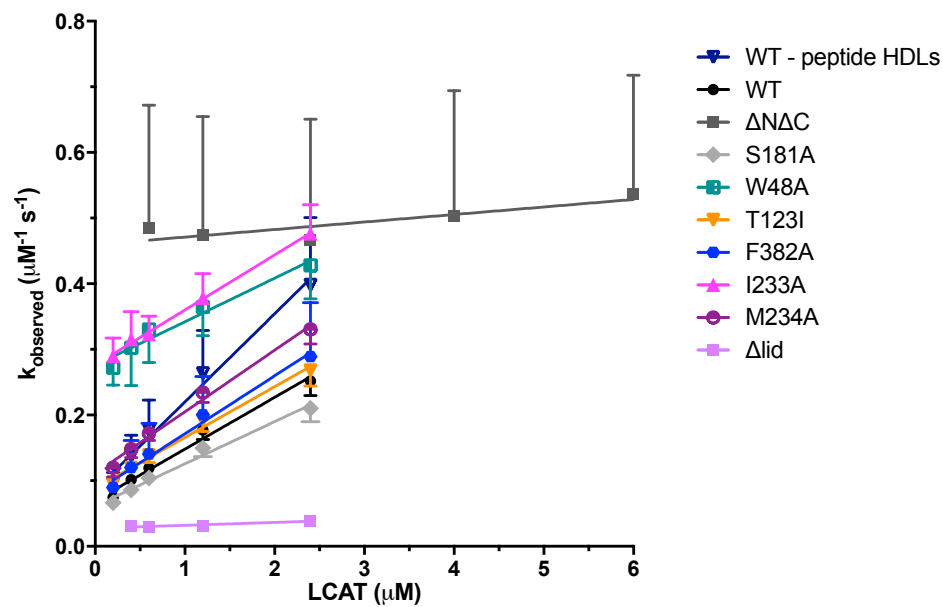

Figure S5. Plots used to determine  $k_{\text{on}}$  (slope of fit line) and hence  $K_d$  (see methods). All measurements were taken with ApoA-I HDLs except for WT LCAT with peptide HDLs, as indicated.

Figure S6

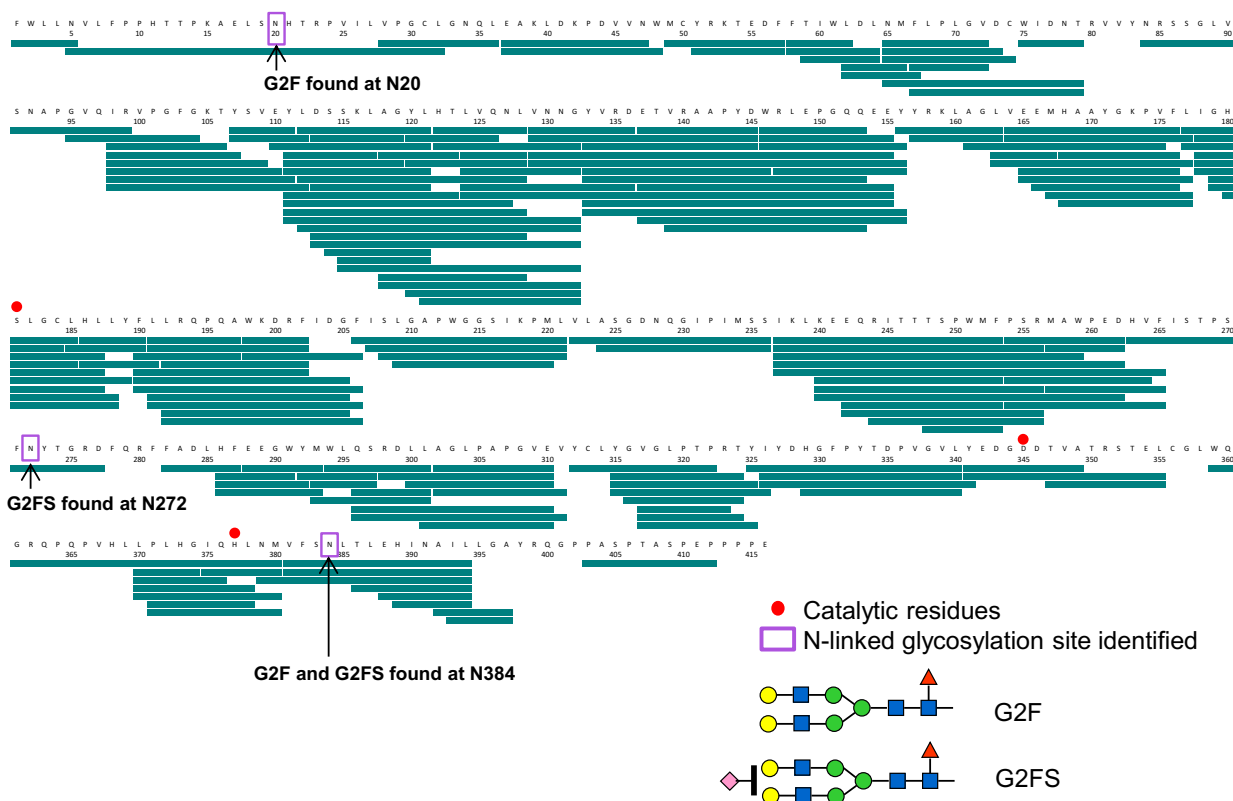

**Figure S6.** 95% of LCAT sequence coverage achieved by online pepsin digestion. Reproducible peptide fragments (shown as green bars) were produced in both IDFP bound and unbound forms. A total of 187 peptides were reproducibly generated in all 50 digestions. N-linked glycosylation was observed, as expected, at Asn20, Asn272, and Asn384, however N-linked glycosylation at Asn84 and O-linked glycosylation at Thr407 and Ser409 were not observed.

Figure S7

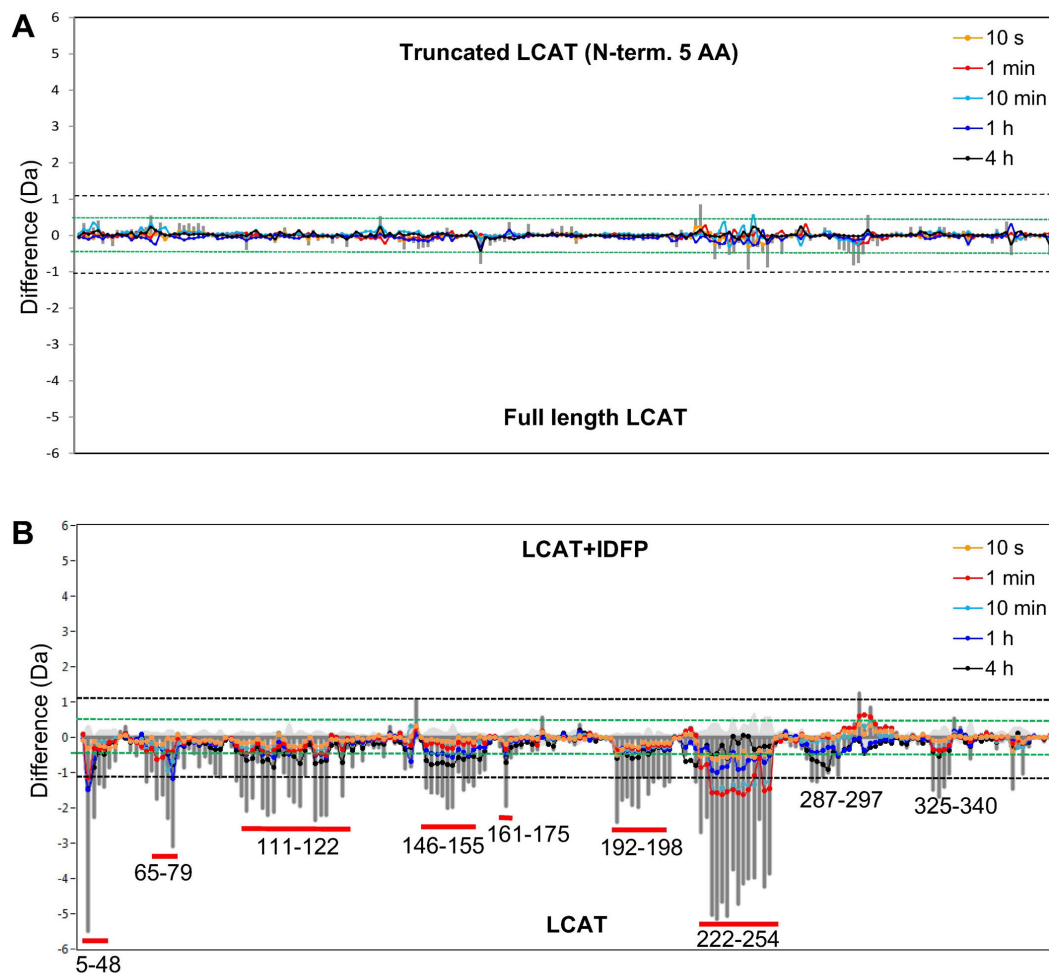

**Figure S7.** HDX MS difference plots. (A) The difference plot is the difference (y-axis) of deuterium uptake (Da) between truncated LCAT (top) and full length LCAT (bottom). Overall measured exchange for all peptides were not significantly different for any of the time-points. The green dotted lines at y-axis values +0.5 Da represent the 98% confident limits for difference between individual time points, whereas the black dotted lines at y-axis +1.1 Da indicate the boundary of significance for the sum of all time-points difference. (B) Difference of deuterium uptake (Da) between LCAT treated with IDFP (top) and without IDFP (bottom). Peptides with significant differences (stronger protection) are marked with the red bar along with their corresponding residue numbers.

Figure S8

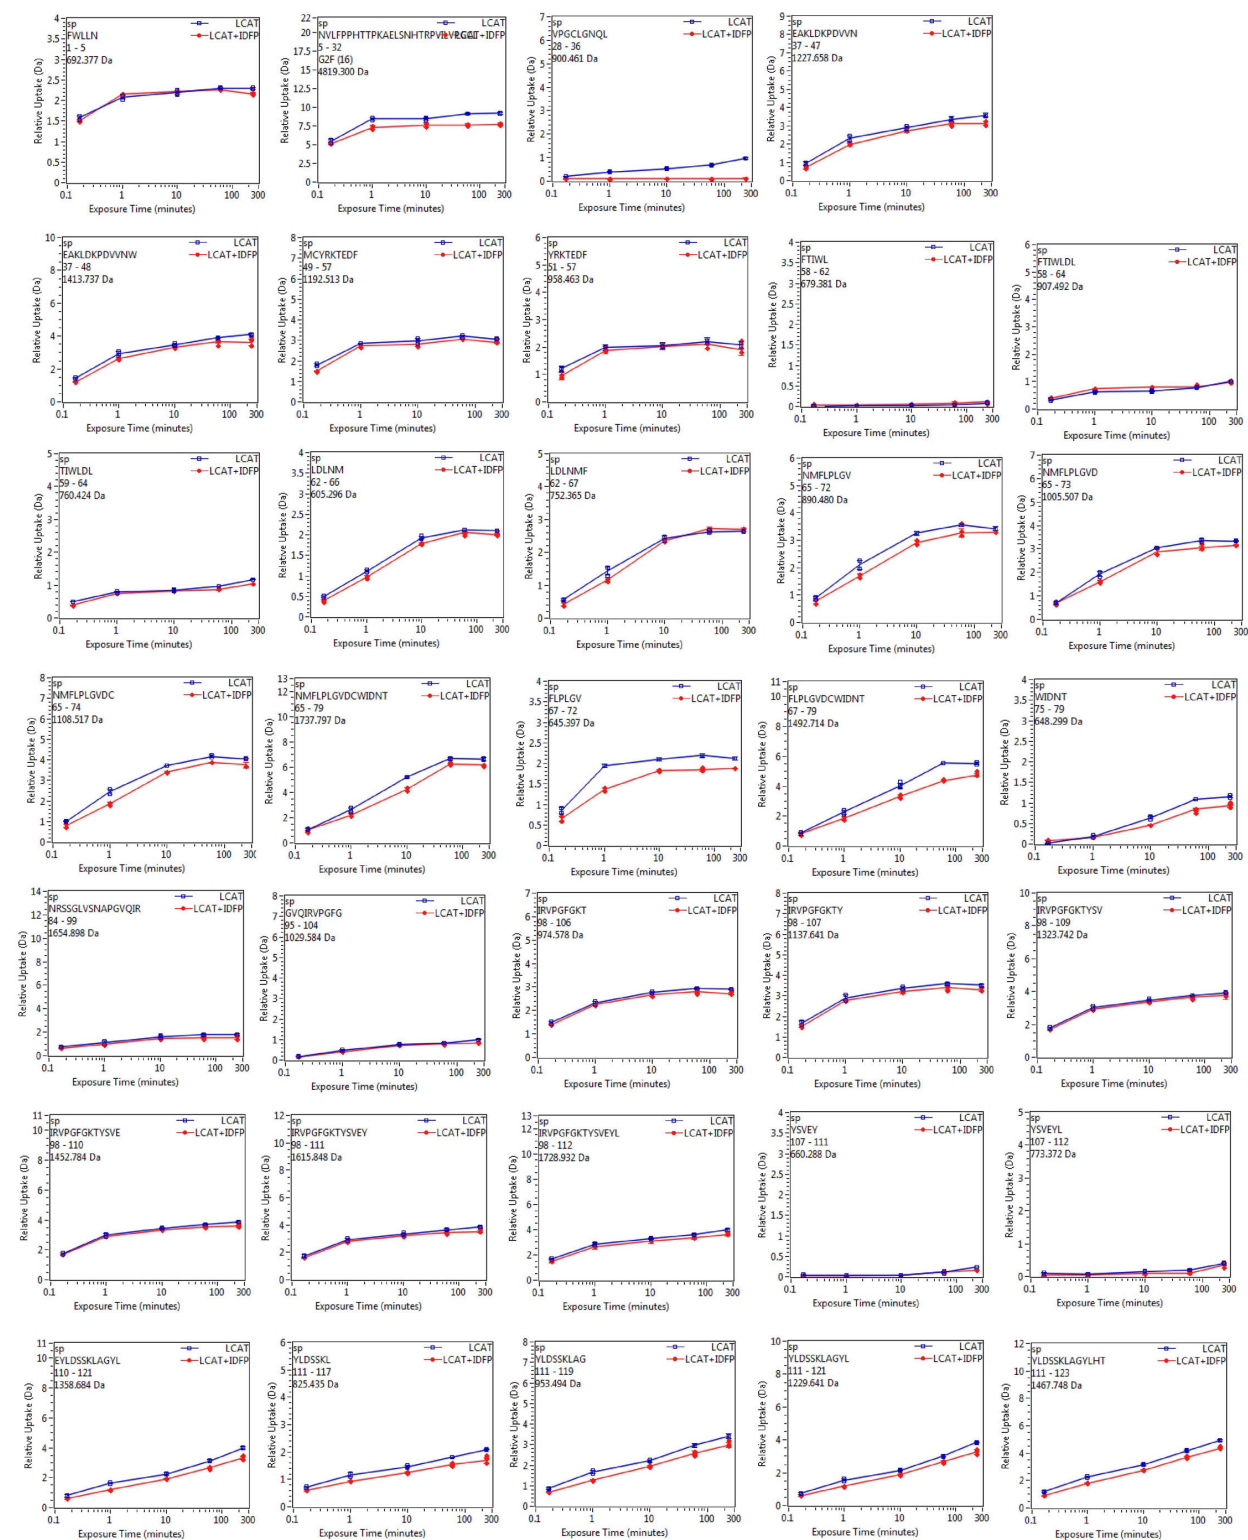

Figure S8 (continued)

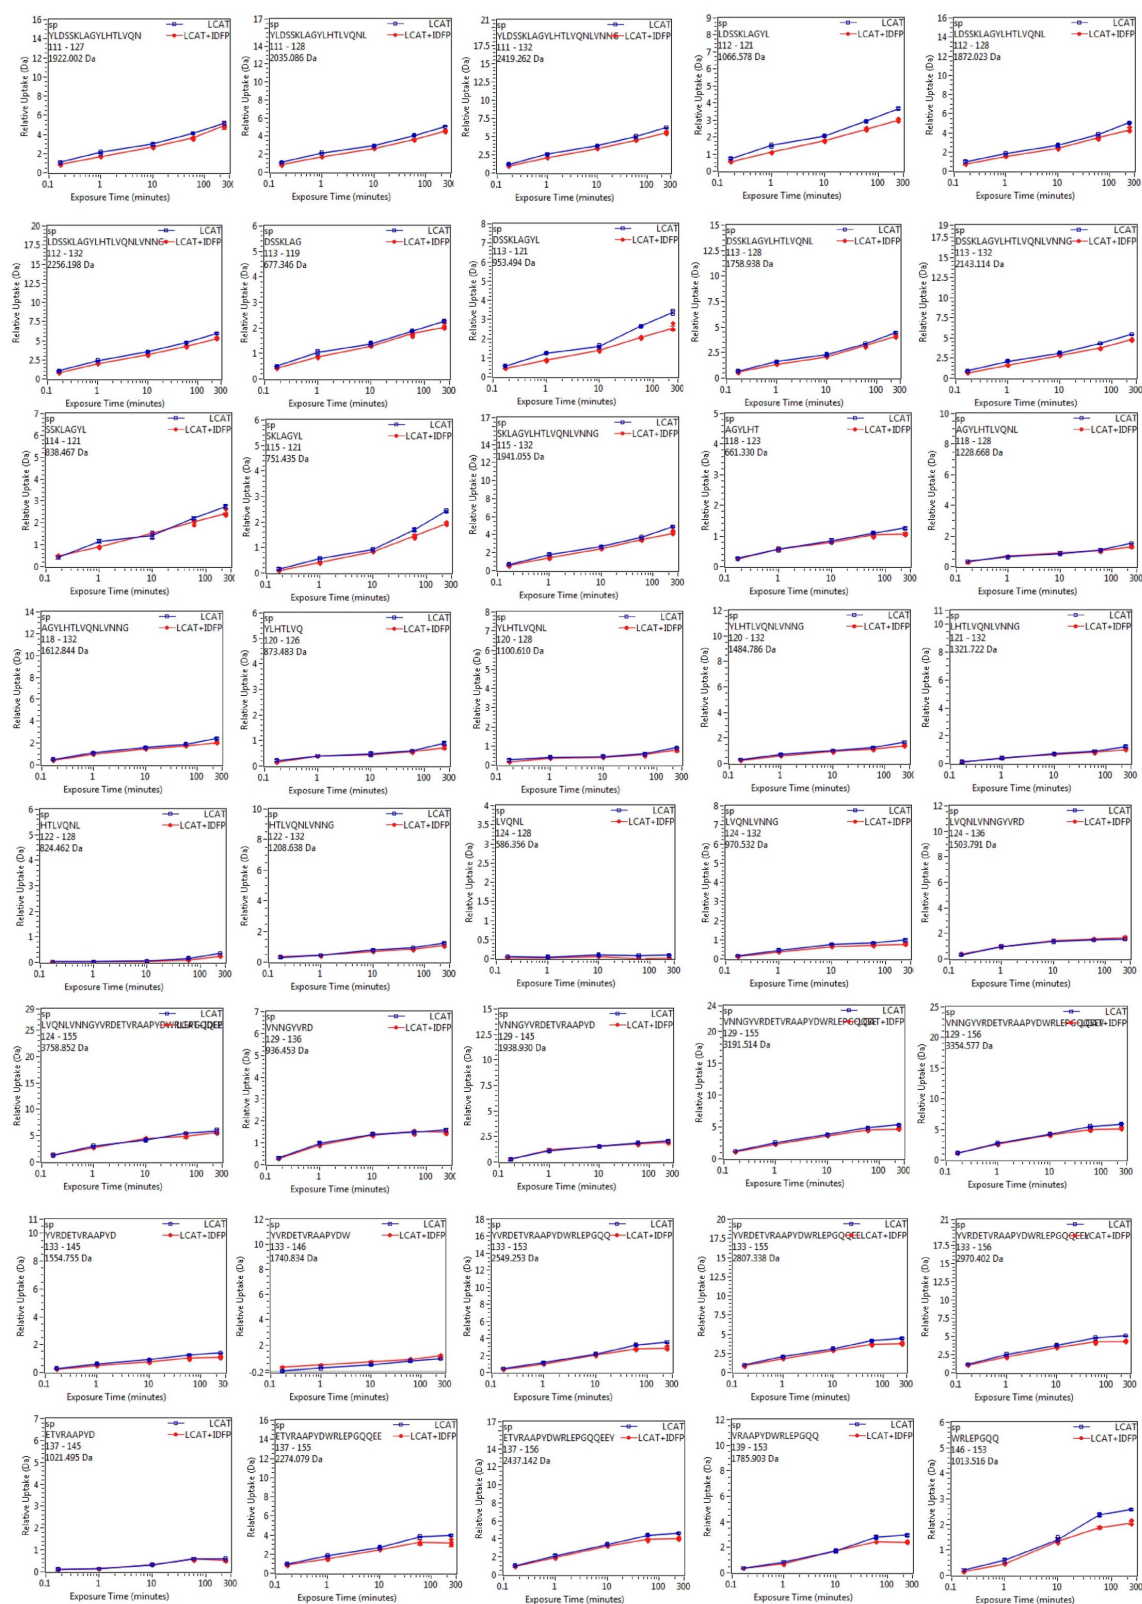

Figure S8 (continued)

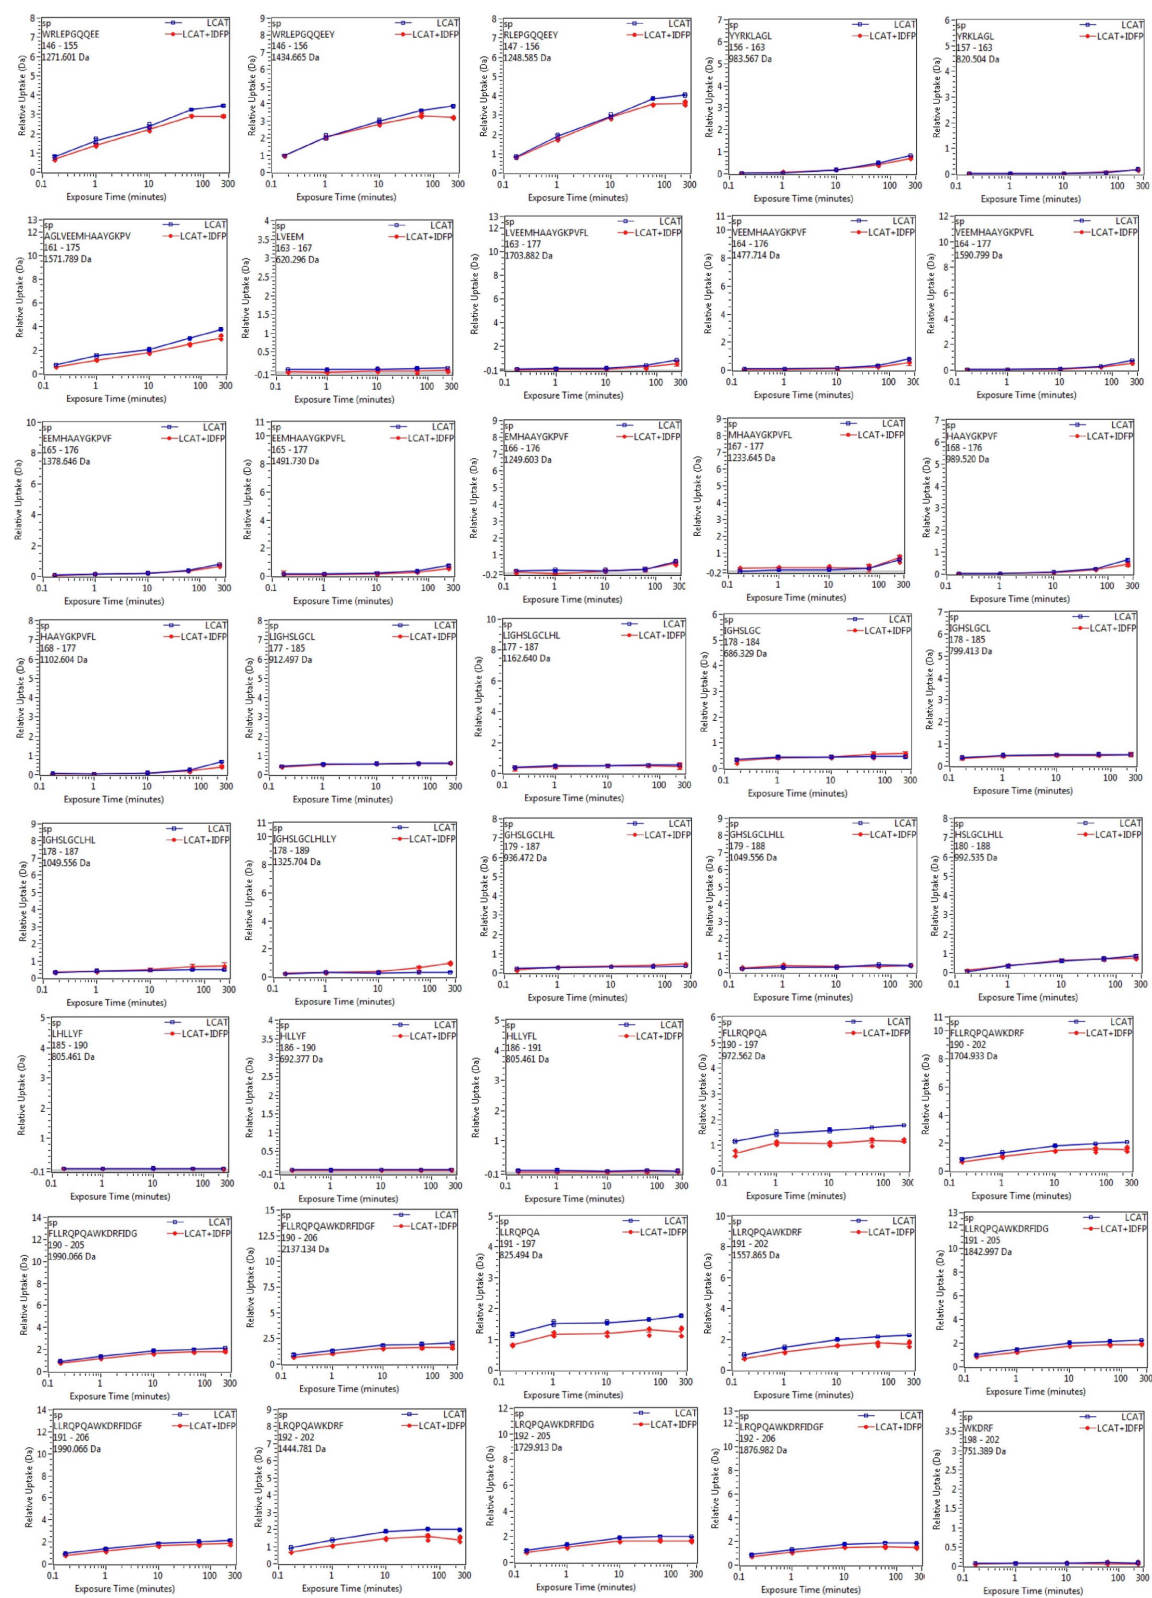

Figure S8 (continued)

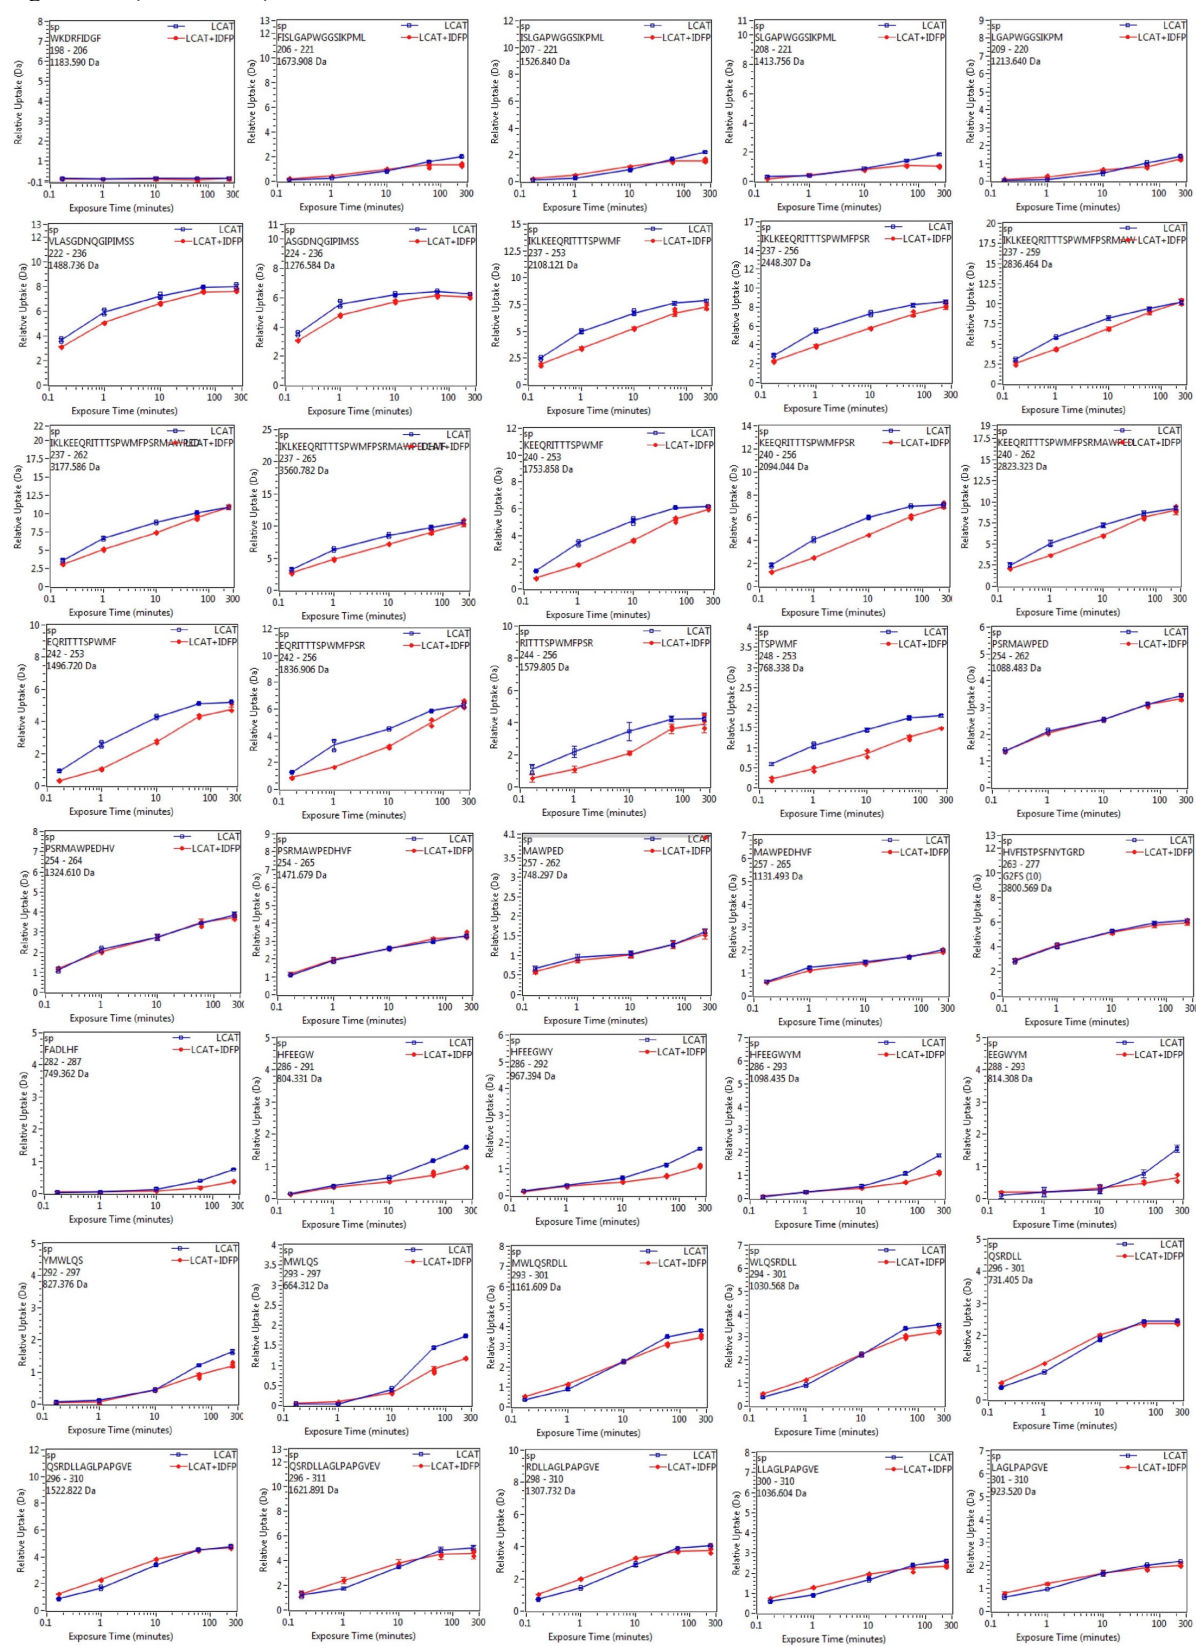

Figure S8 (continued)

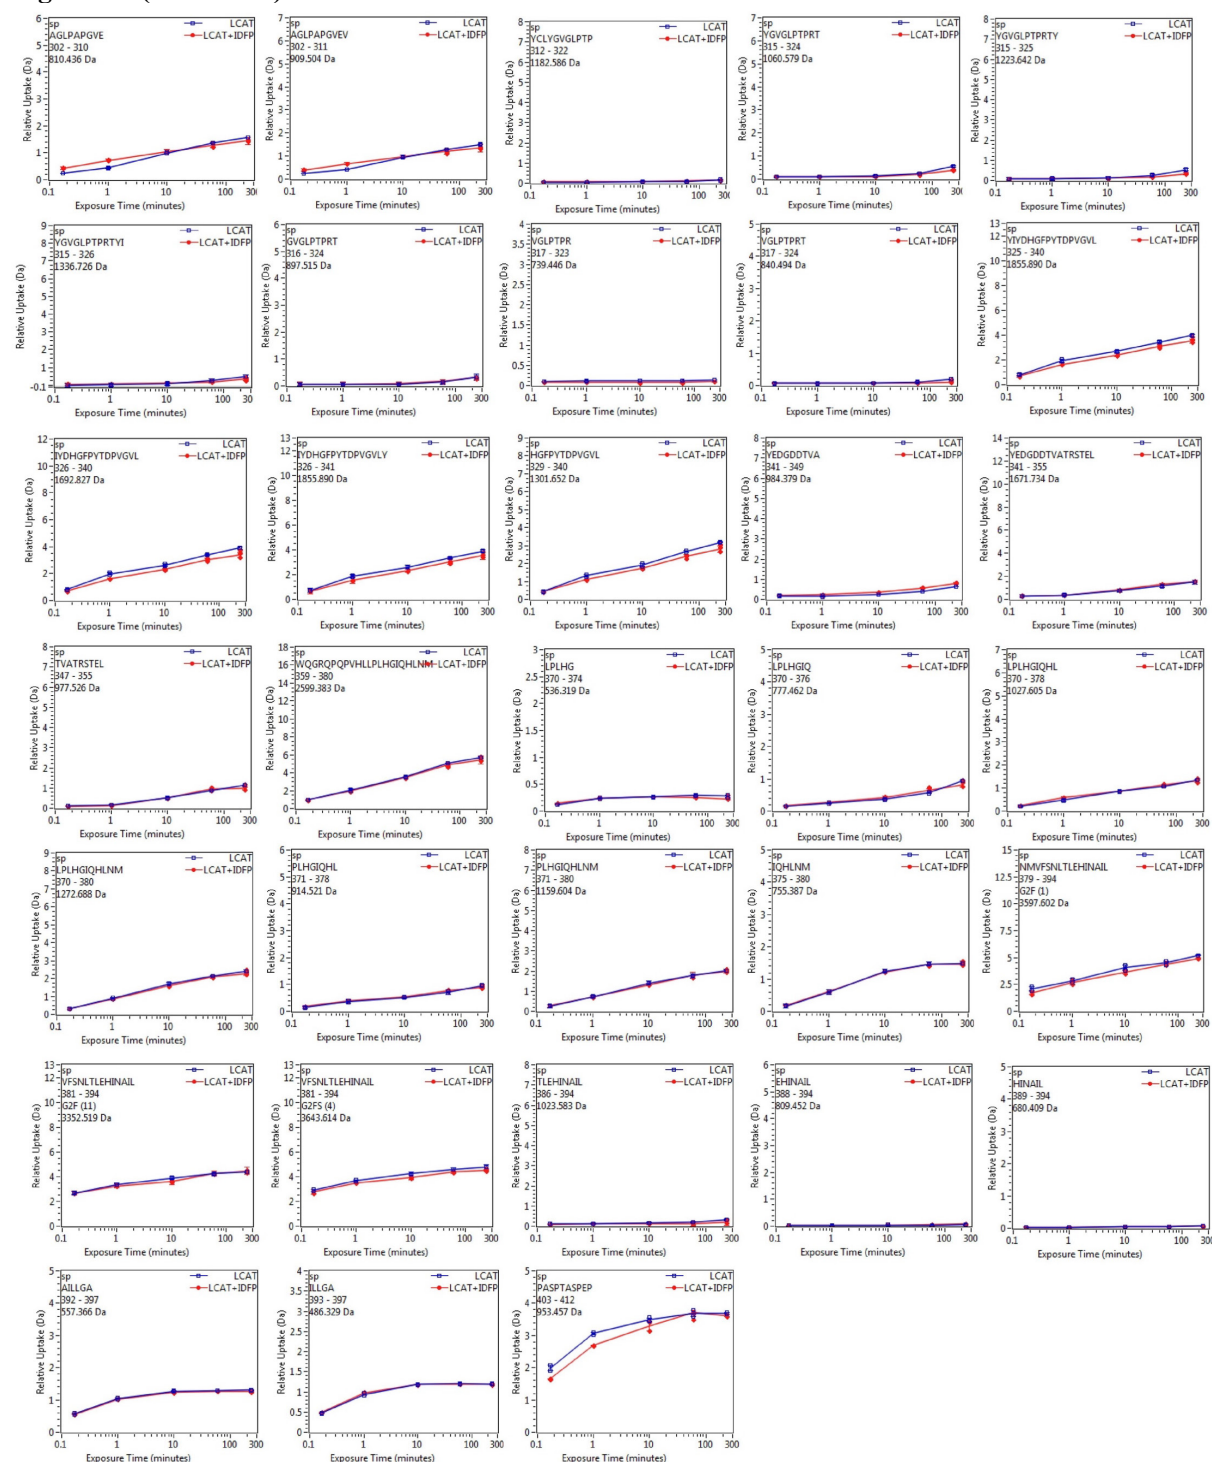

Figure S7. Deuterium uptake curves for a total of 187 peptides in the sequence coverage map. Native and IDFP-bound individual peptide deuterium uptake curves are compared at 5 time-points.



Figure S9

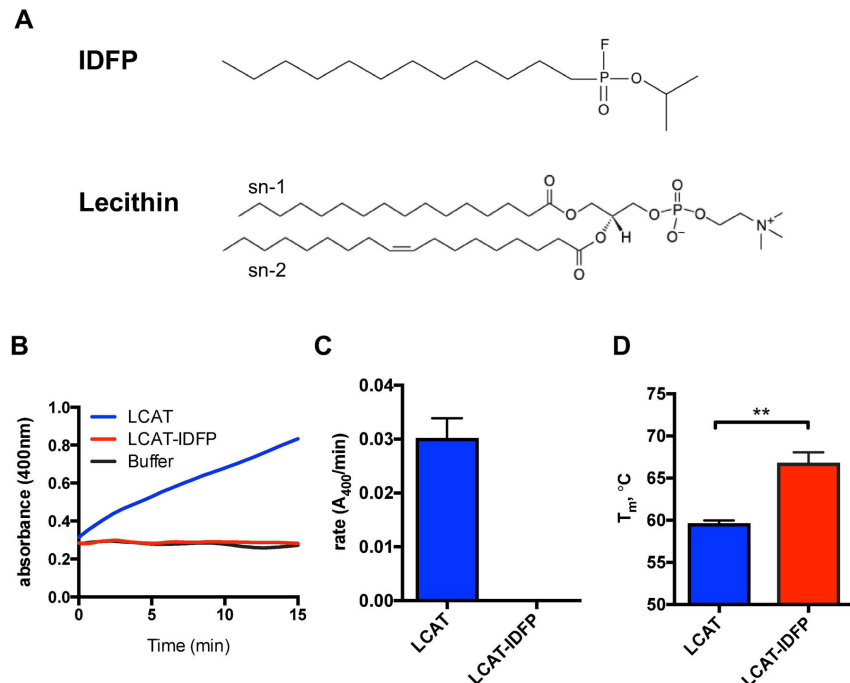

**Figure S9.** LCAT derivatization with IDFP. (A) Chemical structures of isopropyl dodecyl fluorophosphonate (IDFP) and lecithin. (B) pNPB esterase activity of IDFP-treated LCAT is compared to LCAT alone and buffer alone as a control. IDFP treated LCAT showed no activity on the soluble substrate pNPB, confirming that LCAT was fully derivatized. (C) The rate of esterase activity with error bars representing the standard deviation from three independent experiments. (D) DSF  $T_m$  values of LCAT with and without IDFP at 200  $\mu\text{M}$ . Treatment with IDFP increased the  $T_m$  by 7  $^{\circ}\text{C}$ , indicating that IDFP-bound LCAT is more stable than LCAT alone. Data are from three independent experiments performed in triplicate. \*\* indicates that the data are statistically significant, p value = 0.0058 (paired t-test).

Figure S10

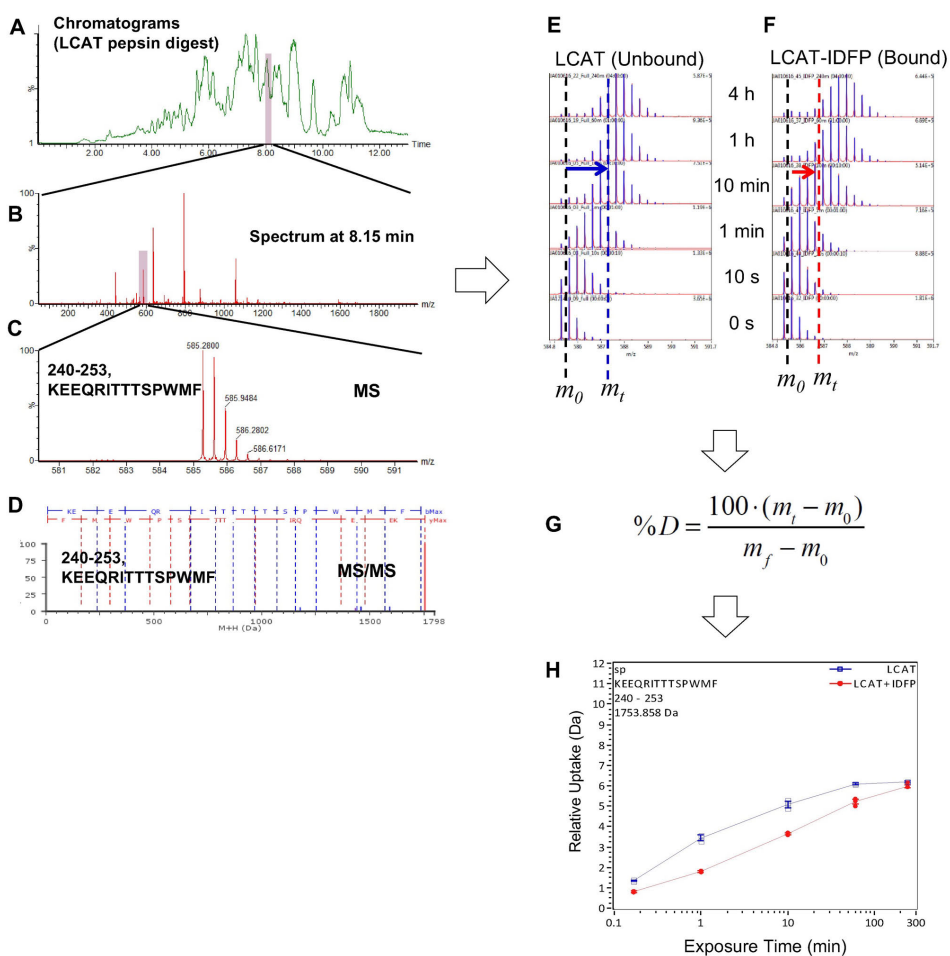

**Figure S10.** HDX MS data processing workflow. Representative chromatography of digested LCAT is shown in (A). The peptide KEEQRITTTSPWMF (240-253) is eluted at 8.15 min and its MS spectra are shown in (B, C) for undeuterated species. Its MS/MS spectrum with fragmentation ion identification is shown in (D). The time-course data at  $t = 0$  s, 10 s, 1 min, 10 min, 60 min, and 240 min are processed (E, F) to determine the intensity weighted center mass ( $m_0$  and  $m_t$ ) and the normalized percent deuteration was determined using the equation in (G). The deuterium uptake of the selected peptide is plotted (H) for LCAT alone in blue and IDFP-bound LCAT in red.

**Movie S1.** Hypothetical transition between closed and open conformations of LCAT. The movie highlights the opening of the lid and corresponding cap domain movements that could occur upon HDL association. Thr123, Phe382, and the active site location Ser181 are shown as sticks. The closed and open-2Fab conformations of LCAT (PDB entries 5TXF and 5BV7, respectively) were aligned in PyMOL, and Chimera was used to morph from one structure to the other. The movie was rendered using PyMOL.
